# Supplementary material for: Generation and Characterization of an Inducible Cx43 Overexpression System in Mouse Embryonic Stem Cells
Source: Cells. 2022 Feb 16;11(4):694. doi: 10.3390/cells11040694 (PMC8869955; doi:10.3390/cells11040694)
Supplement: Supplementary file 1 [file cells-11-00694-s001.zip]

Archive with 14 entries (14 files):
- cells-1543381 supplementary.pdf
- Supplementary Video S1 FRAP experiments of Cre+ 3T3 fibroblasts_Calcein AM.mp4
- Supplementary Video S10 Beating Cre+ cell cluster after partial dissociation of EBs and plating.mp4
- Supplementary Video S11 Beating Cre- cell cluster after partial dissociation of EBs and plating.mp4
- Supplementary Video S12 Beating monolayer of neonatal cardiomyocytes (NNCMs, P1) one day post isolation.mp4
- Supplementary Video S13 Beating monolayer of NNCMs (P1) three days post transduction with AAV2.6-Cx43-P2A-mCherry virus.mp4
- Supplementary Video S2 FRAP experiments of Cre+ 3T3 fibroblasts_mCherry.mp4
- Supplementary Video S3 FRAP experiments of Cre- 3T3 fibroblasts_Calcein AM.mp4
- Supplementary Video S4 FRAP experiments of WT 3T3 fibroblasts_Calcein AM.mp4
- Supplementary Video S5 FRAP experiments of Cre+ G4 ES cell_Calcein AM.mp4
- Supplementary Video S6 FRAP experiments of Cre+ G4 ES cell_mCherry.mp4
- Supplementary Video S7 FRAP experiments of Cre- G4 ES cells_Calcein AM.mp4
- Supplementary Video S8 Beating Cre+ EB.mp4
- Supplementary Video S9 Beating Cre- EB.mp4
